# Supplementary material for: Translation, Cross-Cultural Adaptation, and Validation of the Malay Version of the System Usability Scale Questionnaire for the Assessment of Mobile Apps
Source: PubMed Central journal article supplement (PMC5972216; doi:10.2196/10308), 2018-05-14
Supplement: humanfactors_v5i2e10308_app1.pdf [file humanfactors_v5i2e10308_app1.pdf]

**Soal Selidik Skala Kebolegunaan Aplikasi Mudah Alih**

| <b>Skala Kebolegunaan Aplikasi Mudah Alih<br/>(SKAMA<sup>®</sup>)</b>                                                                                                                                                                                                                                                                                                                                                                                                                                                                                                                                                                                                       |   |   |   |   |   |
|-----------------------------------------------------------------------------------------------------------------------------------------------------------------------------------------------------------------------------------------------------------------------------------------------------------------------------------------------------------------------------------------------------------------------------------------------------------------------------------------------------------------------------------------------------------------------------------------------------------------------------------------------------------------------------|---|---|---|---|---|
| <p><b>Bagi soalan di bawah, sila tandakan jawapan yang paling sesuai berdasarkan skala seperti berikut.</b></p> <div style="text-align: center; border: 1px solid black; padding: 10px; margin: 10px auto; width: 80%;"> <p> <span style="margin-right: 20px;">Sangat tidak bersetuju</span> <span style="margin-right: 20px;">1</span> <span style="margin-right: 20px;">2</span> <span style="margin-right: 20px;">3</span> <span style="margin-right: 20px;">4</span> <span style="margin-right: 20px;">5</span> <span style="margin-left: 20px;">Sangat bersetuju</span> </p>  </div> |   |   |   |   |   |
|                                                                                                                                                                                                                                                                                                                                                                                                                                                                                                                                                                                                                                                                             | 1 | 2 | 3 | 4 | 5 |
| 1. Saya rasa saya ingin kerap menggunakan aplikasi mudah alih ini.                                                                                                                                                                                                                                                                                                                                                                                                                                                                                                                                                                                                          |   |   |   |   |   |
| 2. Saya rasa aplikasi mudah alih ini sesuatu yang rumit.                                                                                                                                                                                                                                                                                                                                                                                                                                                                                                                                                                                                                    |   |   |   |   |   |
| 3. Saya rasa aplikasi mudah alih ini mudah untuk digunakan.                                                                                                                                                                                                                                                                                                                                                                                                                                                                                                                                                                                                                 |   |   |   |   |   |
| 4. Saya memerlukan bantuan daripada orang lain untuk menggunakan aplikasi mudah alih ini.                                                                                                                                                                                                                                                                                                                                                                                                                                                                                                                                                                                   |   |   |   |   |   |
| 5. Saya mendapati fungsi-fungsi dalam aplikasi mudah alih ini saling bersepadu (berhubungkait) dengan baik.                                                                                                                                                                                                                                                                                                                                                                                                                                                                                                                                                                 |   |   |   |   |   |
| 6. Saya rasa terdapat banyak kandungan di dalam aplikasi mudah alih ini yang tidak konsisten antara satu sama lain.                                                                                                                                                                                                                                                                                                                                                                                                                                                                                                                                                         |   |   |   |   |   |
| 7. Saya membayangkan bahawa kebanyakan orang akan cepat belajar menggunakan aplikasi mudah alih ini.                                                                                                                                                                                                                                                                                                                                                                                                                                                                                                                                                                        |   |   |   |   |   |
| 8. Saya mendapati aplikasi mudah alih ini leceh untuk digunakan.                                                                                                                                                                                                                                                                                                                                                                                                                                                                                                                                                                                                            |   |   |   |   |   |
| 9. Saya berasa yakin menggunakan aplikasi mudah alih ini.                                                                                                                                                                                                                                                                                                                                                                                                                                                                                                                                                                                                                   |   |   |   |   |   |
| 10. Saya perlu belajar terlalu banyak perkara sebelum boleh menggunakan aplikasi mudah alih ini.                                                                                                                                                                                                                                                                                                                                                                                                                                                                                                                                                                            |   |   |   |   |   |
